# Supplementary material for: Search for new biologically active compounds: in vitro studies of antitumor and antimicrobial activity of dirhodium(ii,ii) paddlewheel complexes
Source: Royal Society of Chemistry journal article supplement (doi:10.1039/d4dt01082e), 2024-01-01
Supplement: d4dt01082e1.pdf [file d4dt01082e1.pdf]

**Search for new biologically active compounds: *In vitro* studies of antitumor and antimicrobial activity of dirhodium(II,II) paddlewheel complexes**

Marina Mitrović<sup>a</sup>, Maja B. Djukić<sup>b</sup>, Milena Vukić<sup>b</sup>, Ivana Nikolić<sup>a</sup>, Marko D. Radovanović<sup>b</sup>, Jovan Luković<sup>a</sup>, Ignjat P. Filipović<sup>b</sup>, Sanja Matić<sup>c</sup>, Tijana Marković<sup>c</sup>, Olivera R. Klisurić<sup>d</sup>, Suzana Popović<sup>e</sup>, Zoran D. Matović<sup>b</sup>, Marija S. Ristić<sup>b,\*</sup>

<sup>a</sup> *University of Kragujevac, Faculty of Medical Sciences, Department of Medical Biochemistry, Svetozara Markovića 69, 34000 Kragujevac, Serbia*

<sup>b</sup> *University of Kragujevac, Faculty of Science, Department of Chemistry, Radoja Domanovića 12, 34000 Kragujevac, Serbia*

<sup>c</sup> *University of Kragujevac, Faculty of Medical Sciences, Department of Pharmacy, Svetozara Markovića 69, 34000 Kragujevac, Serbia*

<sup>d</sup> *University of Novi Sad, Faculty of Sciences, Department of Physics, Trg Dositeja Obradovića 4, 21000 Novi Sad, Serbia*

<sup>e</sup> *University of Kragujevac, Faculty of Medical Sciences, Centre for Molecular Medicine and Stem Cell Research, Svetozara Markovića 69, 34000 Kragujevac, Serbia*

\*Corresponding author:

Dr. Marija Ristić, e-mail: [marija.jeremic@pmf.kg.ac.rs](mailto:marija.jeremic@pmf.kg.ac.rs)

| TABLE OF CONTENTS                                                                                                                                                                                                                                                                                                                                                                                                                                                                          | page |
|--------------------------------------------------------------------------------------------------------------------------------------------------------------------------------------------------------------------------------------------------------------------------------------------------------------------------------------------------------------------------------------------------------------------------------------------------------------------------------------------|------|
| <b>HSA binding studies</b>                                                                                                                                                                                                                                                                                                                                                                                                                                                                 | S4   |
| <b>DNA-binding studies</b>                                                                                                                                                                                                                                                                                                                                                                                                                                                                 | S4   |
| <b>Fig. S1.</b> $^1\text{H}$ NMR spectra of complexes <b>Rh1-Rh4</b>                                                                                                                                                                                                                                                                                                                                                                                                                       | S6   |
| <b>Fig. S2</b> $^{13}\text{C}$ NMR spectra of complexes <b>Rh1-Rh4</b>                                                                                                                                                                                                                                                                                                                                                                                                                     | S8   |
| <b>Fig. S3</b> IR spectra of complexes <b>Rh1-Rh4</b>                                                                                                                                                                                                                                                                                                                                                                                                                                      | S9   |
| <b>Fig. S4</b> UV-Vis spectra of <b>Rh1-Rh4</b> complexes                                                                                                                                                                                                                                                                                                                                                                                                                                  | S10  |
| <b>Fig. S5</b> MERCURY drawing of the overlay of the two crystallographically independent molecules of the <b>Rh4</b> complex: the molecule containing the Rh1 atom is shown in magenta, and the molecule containing the Rh2 atom in yellow                                                                                                                                                                                                                                                | S10  |
| <b>Fig. S6</b> MERCURY drawing of the crystal packing of <b>Rh4</b> viewed along the <i>c</i> axis, showing C—H $\cdots$ O contacts (dashed line) which connect molecules in a head-to-tail manner along the <i>a</i> axis                                                                                                                                                                                                                                                                 | S11  |
| <b>Fig. S7</b> Emission spectra of HSA in the presence of complexes <b>Rh1-Rh4</b> . [HSA] = 2 $\mu\text{M}$ , [complex] = 0-20 $\mu\text{M}$ ; $\lambda_{\text{ex}}$ = 295 nm. The arrow shows the changes of the intensity upon increasing the concentration of complexes. The inset shows the plot of $F_0/F$ vs. [Q]                                                                                                                                                                   | S11  |
| <b>Fig. S8</b> HSA-ibuprofen emission spectra in the presence of <b>Rh1-Rh4</b> . [HSA] = [ibuprofen] = 2 $\mu\text{M}$ , [complex] = 0-20 $\mu\text{M}$ ; $\lambda_{\text{ex}}$ = 295 nm. The arrow shows the changes of the intensity upon increasing the concentration of complexes. The inset shows the plot of $F_0/F$ vs. [Q].                                                                                                                                                       | S12  |
| <b>Fig. S9</b> HSA-methyl orange emission spectra in the presence of <b>Rh1-Rh4</b> . [HSA] = [methyl orange] = 2 $\mu\text{M}$ , [complex] = 0-20 $\mu\text{M}$ ; $\lambda_{\text{ex}}$ = 295 nm. The arrow shows the changes of the intensity upon increasing the concentration of complexes. The inset shows the plot of $F_0/F$ vs. [Q].                                                                                                                                               | S12  |
| <b>Fig S10</b> Emission spectra of DNA-EB (left)/DNA-HOE (right) in the absence and presence of <b>Rh1</b> . [DNA] = 100 $\mu\text{M}$ ; [EB/HOE] = 10 $\mu\text{M}$ ; [ <b>Rh1</b> ] = 0-180 $\mu\text{M}$ for EB; 0-400 $\mu\text{M}$ for HOE. $\lambda_{\text{ex}}$ (EB) = 520 nm; $\lambda_{\text{ex}}$ (HOE) = 346 nm. Arrow shows the changes of the intensity upon increasing the concentration of complex. The inset shows the plot of $F_0/F$ vs. [Q]. X represents free complex. | S13  |
| <b>Fig S11</b> Emission spectra of DNA-EB (left)/DNA-HOE (right) in the absence and presence of <b>Rh2</b> . [DNA] = 100 $\mu\text{M}$ ; [EB/HOE] = 10 $\mu\text{M}$ ; [ <b>Rh2</b> ] = 0-180 $\mu\text{M}$ for EB; 0-400 $\mu\text{M}$ for HOE. $\lambda_{\text{ex}}$ (EB) = 520 nm; $\lambda_{\text{ex}}$ (HOE) = 346 nm. Arrow shows the changes of the intensity upon increasing the concentration of complex. The inset shows the plot of $F_0/F$ vs. [Q]. X represents free complex. | S13  |
| <b>Fig S12</b> Emission spectra of DNA-EB (left)/DNA-HOE (right) in the absence and presence of <b>Rh3</b> . [DNA] = 100 $\mu\text{M}$ ; [EB/HOE] = 10 $\mu\text{M}$ ; [ <b>Rh3</b> ] = 0-180 $\mu\text{M}$ for EB; 0-400 $\mu\text{M}$ for HOE. $\lambda_{\text{ex}}$ (EB) = 520 nm; $\lambda_{\text{ex}}$ (HOE) = 346 nm. Arrow shows the changes of the intensity upon increasing the concentration of complex. The inset shows the plot of $F_0/F$ vs. [Q]. X represents free complex. | S13  |
| <b>Fig. S13</b> Absorption spectra of <b>Rh1-Rh4</b> complexes in the absence and presence of increasing amounts of CT DNA: [complex] = 100 $\mu\text{M}$ , [DNA] = 0-500 $\mu\text{M}$ . Inset:                                                                                                                                                                                                                                                                                           | S14  |

|                                                                                                                                                                                                                                                                                                                                                                                                                                                                                                                                                                                                                                                                                                                                                            |     |
|------------------------------------------------------------------------------------------------------------------------------------------------------------------------------------------------------------------------------------------------------------------------------------------------------------------------------------------------------------------------------------------------------------------------------------------------------------------------------------------------------------------------------------------------------------------------------------------------------------------------------------------------------------------------------------------------------------------------------------------------------------|-----|
| linear plot for the calculation of the intrinsic DNA binding constant ( $K_b$ ).                                                                                                                                                                                                                                                                                                                                                                                                                                                                                                                                                                                                                                                                           |     |
| <b>Fig. S14</b> Relative viscosity $(\eta/\eta_0)^{1/3}$ of CT DNA (100 $\mu$ M) in PBS buffer in the presence of the increasing amounts of complexes <b>Rh1-Rh4</b> (r)                                                                                                                                                                                                                                                                                                                                                                                                                                                                                                                                                                                   | S14 |
| <b>Fig. S15</b> Interactions of <b>Rh1-Rh4</b> with residues in binding site of IB domain, obtained by molecular docking.                                                                                                                                                                                                                                                                                                                                                                                                                                                                                                                                                                                                                                  | S15 |
| <b>Fig. S16</b> Structures with the lowest energy of binding of <b>Rh1-Rh3</b> in the minor groove of DNA.                                                                                                                                                                                                                                                                                                                                                                                                                                                                                                                                                                                                                                                 | S15 |
| <b>Fig. S17</b> <b>Rh1-Rh4</b> inhibited the proliferation of Hela cervical, HCT116 colon, and MDA-MB-231 breast cancer cells. Cells were treated with <b>Rh1-Rh4</b> and cisplatin at the indicated concentrations (0.3, 1, 3, 10, 30, 60, and 100 mM) for 48h (A) and 24, 48 and 72 h (B). (A) Bar graphs show % of cytotoxic cells of triplicate readings from a representative experiment; bars, $\pm$ standard error. (B) The dose and time response curves were obtained by plotting the % of cytotoxic cells versus the log concentration of <b>Rh1-Rh4</b> and cisplatin used. Points, mean % of cell cytotoxicity based on quintuplicate assays, bars, $\pm$ SE. * $P < 0.05$ , ** $P < 0.01$ , and *** $P < 0.001$ vs. the control group (ctrl). | S16 |
| <b>Fig. S18</b> Effect of <b>Rh1-Rh4</b> on the morphology of HeLa, HCT116 and MRC-5 cells.                                                                                                                                                                                                                                                                                                                                                                                                                                                                                                                                                                                                                                                                | S17 |
| <b>Table S1</b> Selected geometric parameters for complex <b>Rh4</b>                                                                                                                                                                                                                                                                                                                                                                                                                                                                                                                                                                                                                                                                                       | S17 |
| <b>Table S2</b> C—H $\cdots$ O interactions parameters for complex <b>Rh4</b>                                                                                                                                                                                                                                                                                                                                                                                                                                                                                                                                                                                                                                                                              | S18 |
| <b>Table S3</b> HSA constants ( $K_{sv}$ , $k_q$ , $K_b$ ) and number of binding sites ( $n$ ) for the interactions of <b>Rh1-Rh4</b> in the absence and the presence of site markers                                                                                                                                                                                                                                                                                                                                                                                                                                                                                                                                                                      | S18 |
| <b>Table S4</b> The DNA Stern–Volmer constants ( $K_{sv}$ ) and binding constants ( $K_b$ ) for complexes <b>Rh1-Rh4</b> from CT DNA-EB and CT DNA-HOE fluorescence.                                                                                                                                                                                                                                                                                                                                                                                                                                                                                                                                                                                       | S18 |
| <b>Table S5</b> Estimated energies of binding ( $\Delta E_b$ ) of tested compounds with various targets, obtained from molecular docking experiments.                                                                                                                                                                                                                                                                                                                                                                                                                                                                                                                                                                                                      | S19 |
| <b>Table S6</b> Selectivity index (SI) for <b>Rh1-Rh4</b> and cisplatin for particular tumor cells for 48h.                                                                                                                                                                                                                                                                                                                                                                                                                                                                                                                                                                                                                                                | S19 |
| <b>Table S7</b> Crystallographic data and refinement parameters for complex <b>Rh4</b> .                                                                                                                                                                                                                                                                                                                                                                                                                                                                                                                                                                                                                                                                   | S19 |

## HSA binding studies

Fluorescence quenching is described by the Stern–Volmer equation [1]:

$$F_0/F = 1 + k_q \tau_0 [Q] = 1 + K_{sv}[Q] \quad (\text{S1})$$

where  $F_0$  is the emission intensity in the absence of the compound,  $F$  is the emission intensity in the presence of the compound,  $K_{sv}$  is the Stern–Volmer quenching constant,  $k_q$  is the bimolecular quenching constant,  $\tau_0$  ( $10^{-8}$  s) [2] is the lifetime of the fluorophore in the absence of the quencher, and  $[Q]$  is the concentration of the quencher (complex). The  $K_{sv}$  value is determined as the slope from the plot of  $F_0/F$  versus  $[Q]$  (**Figs. S7-S9**).

The binding constant ( $K$ ) and binding stoichiometry ( $n$ ) of the HSA-complex system can be estimated from the Scatchard equation [1] using the fluorescence intensity data:

$$\log (F_0 - F)/F = \log K_b + n \log [Q] \quad (\text{S2})$$

The values of  $K_b$  and  $n$  were determined from the intercept and slope of the plots of  $\log (F_0 - F)/F$  vs.  $\log [Q]$ .

## DNA-binding studies

### Fluorescence spectroscopy

The relative binding of the complexes to the CT DNA is described by the Stern-Volmer equation [1], in the same way as described for the HSA binding studies:

$$F_0/F = 1 + K_{sv}[Q] \quad (\text{S1})$$

where  $F_0$  and  $F$  are the emission intensities in the absence and in presence of the quencher (complexes **Rh1-Rh4**), respectively,  $[Q]$  is the total concentration of the quencher and  $K_{sv}$  is the Stern-Volmer quenching constant, which can be determined from the slope of the plot of  $F_0/F$  vs.  $[Q]$  (**Figs. S10-S12**).

### Absorption spectroscopy

In order to quantitatively compare the binding strength of the complexes, the intrinsic binding constants  $K_b$  were determined by observing the changes in absorbance at the MLCT band with increasing concentration of CT DNA using the Wolfe–Shimmer equation [3]:

$$[\text{DNA}]/(\varepsilon_A - \varepsilon_f) = [\text{DNA}]/(\varepsilon_b - \varepsilon_f) + 1/[K_b(\varepsilon_b - \varepsilon_f)] \quad (\text{S3})$$

$K_b$  is given by the ratio of the slope to the  $y$ -intercept in the plots  $[\text{DNA}]/(\varepsilon_A - \varepsilon_f)$  vs.  $[\text{DNA}]$  (**Fig. S13**), where  $[\text{DNA}]$  is the DNA concentration in base pairs and  $\varepsilon_A$ ,  $\varepsilon_f$  and  $\varepsilon_b$  are the apparent, free and fully bound complex absorption coefficients, respectively. The apparent extinction coefficient,  $\varepsilon_A$ , is determined by calculating  $A_{\text{obsd}}/[\text{complex}]$ .  $\varepsilon_f$  and  $\varepsilon_b$  correspond to

the extinction coefficient of the bound form of the complex and the extinction coefficient of the free complex.

## References

- [1] J. R. Lakowicz, Principles of Fluorescence Spectroscopy, Springer, New York, USA, 3rd edn, 2006.
- [2] J. R. Lakowicz and G. Weber, Biochemistry, 1973, 12, 4161.
- [3] A. Wolf, G. H. Shimer, T. Meehan, Biochemistry, 26 (1987) 6392–6396.

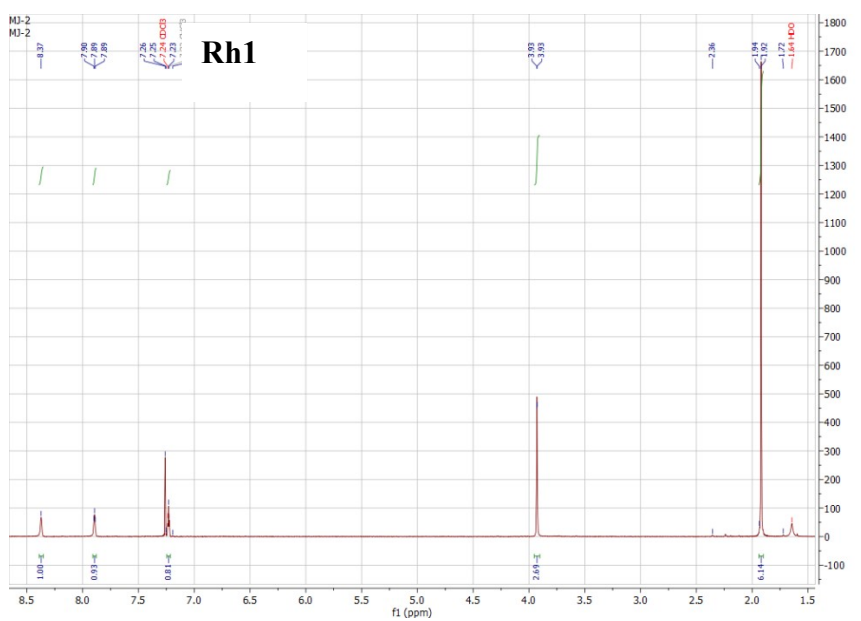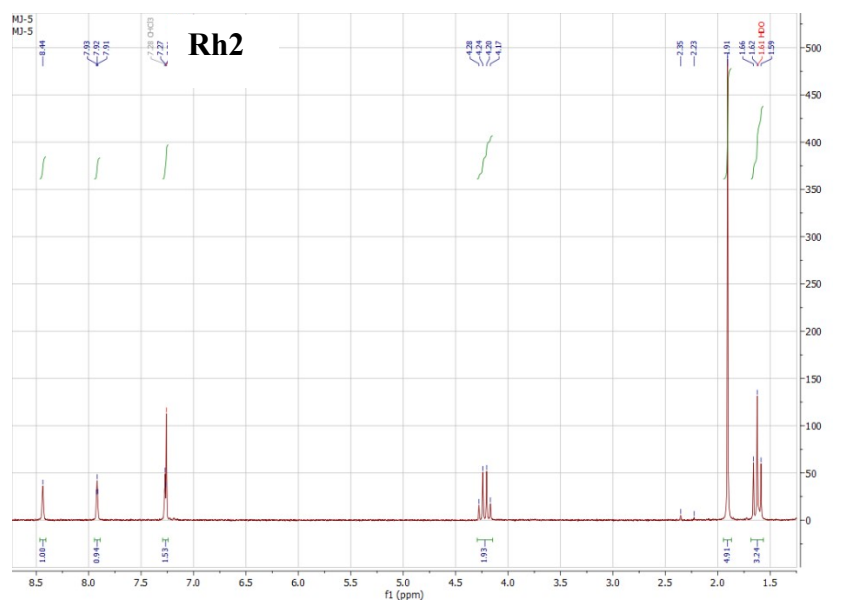

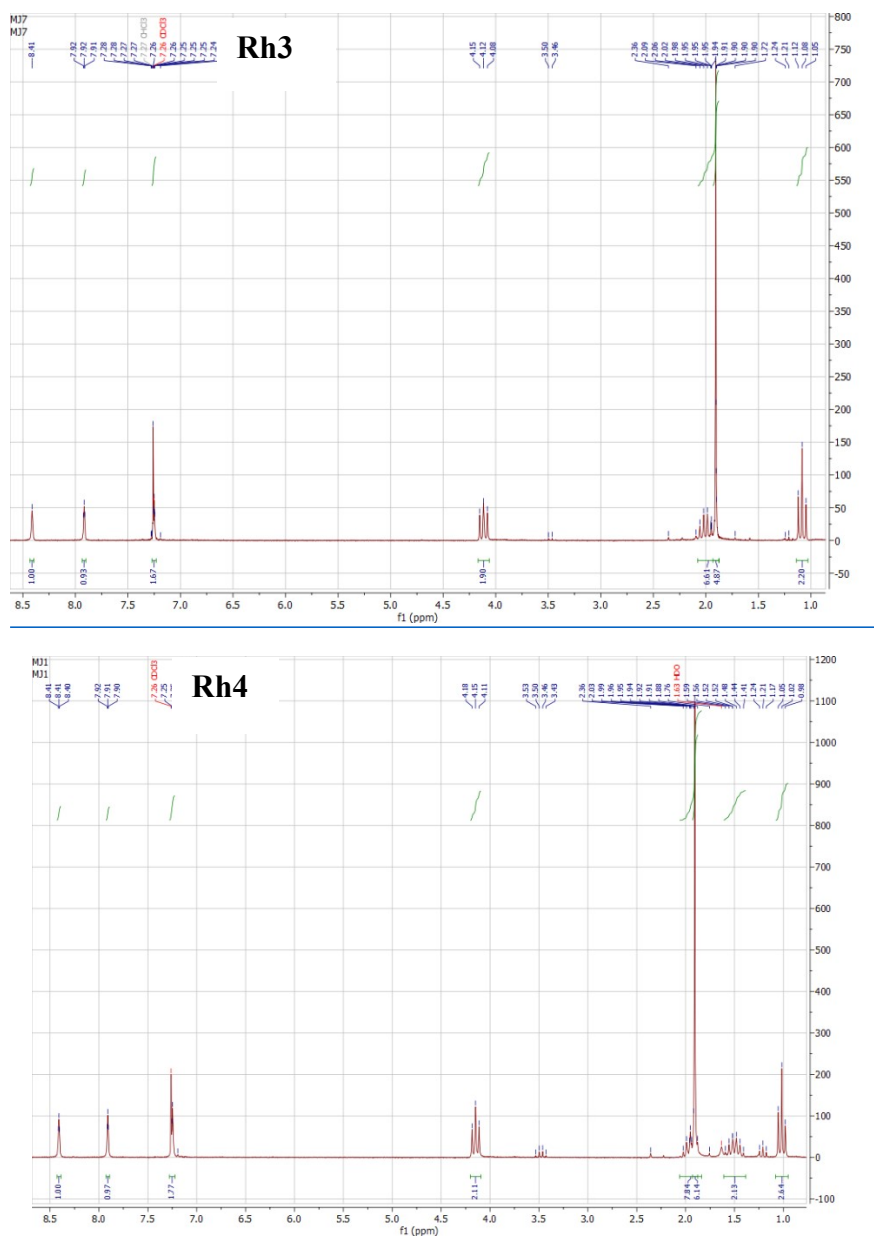

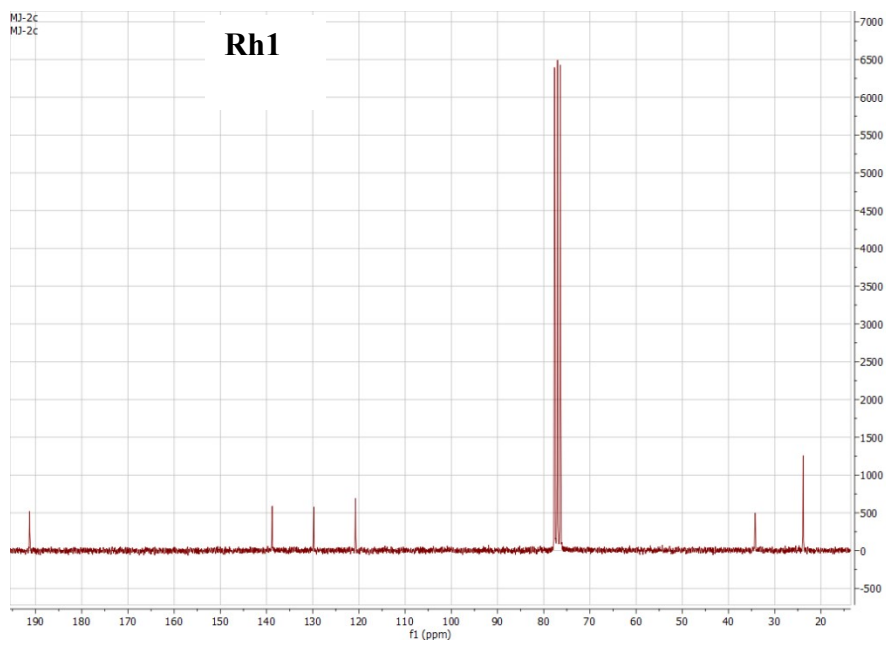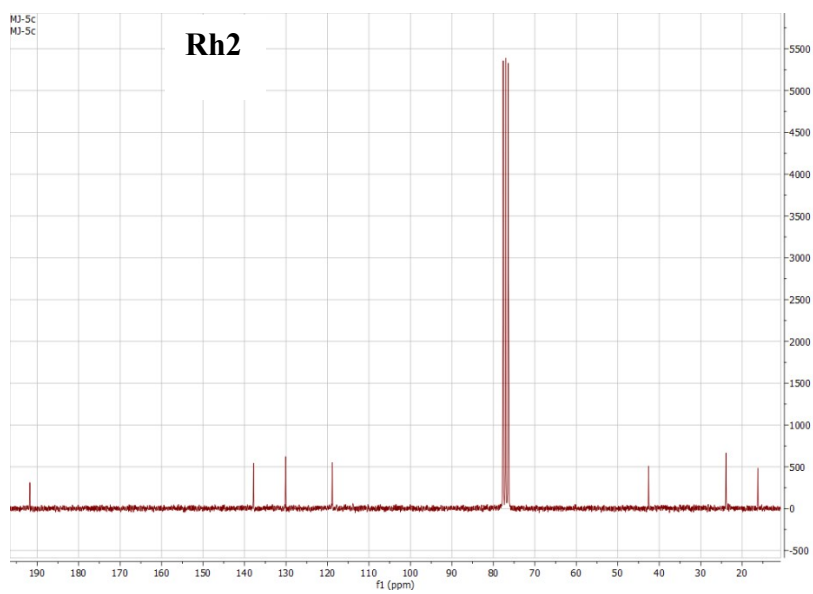

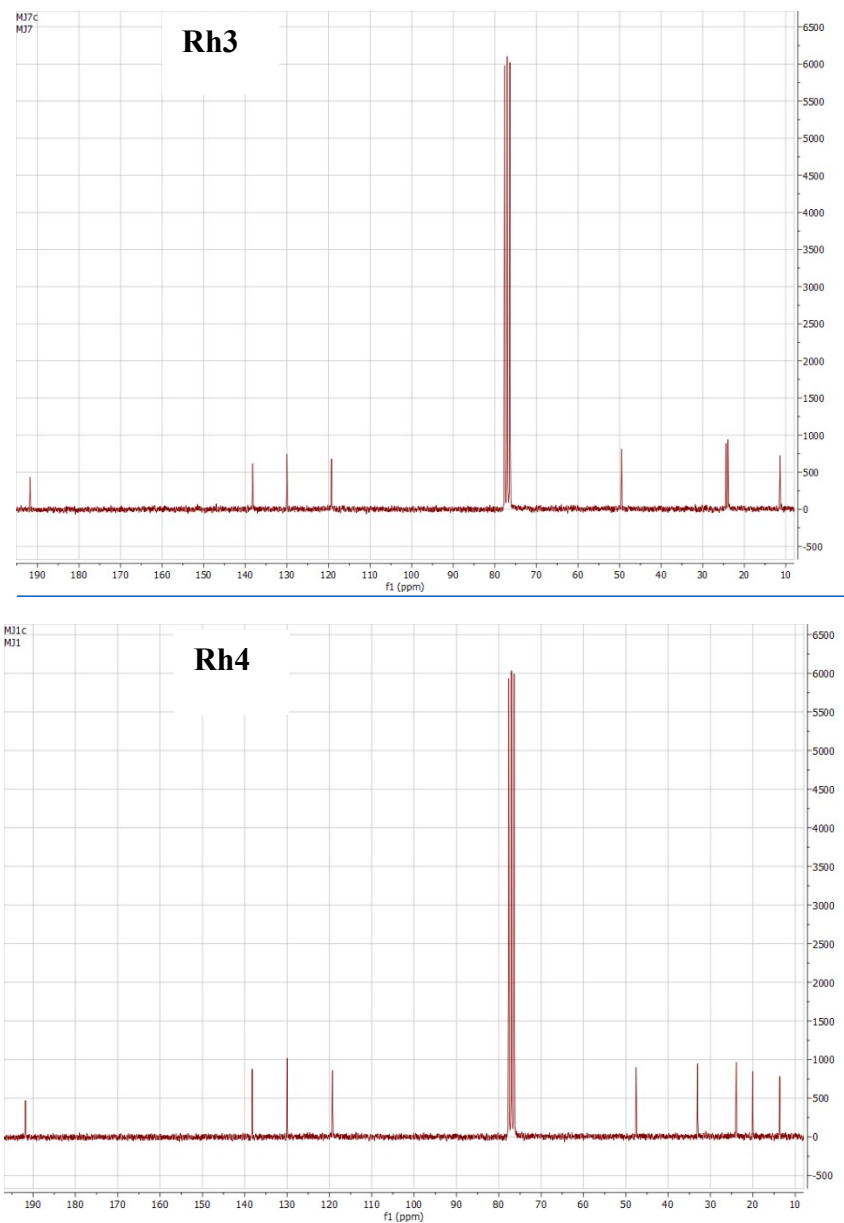

Fig. S2.  $^{13}\text{C}$  NMR spectra of complexes Rh1-Rh4.

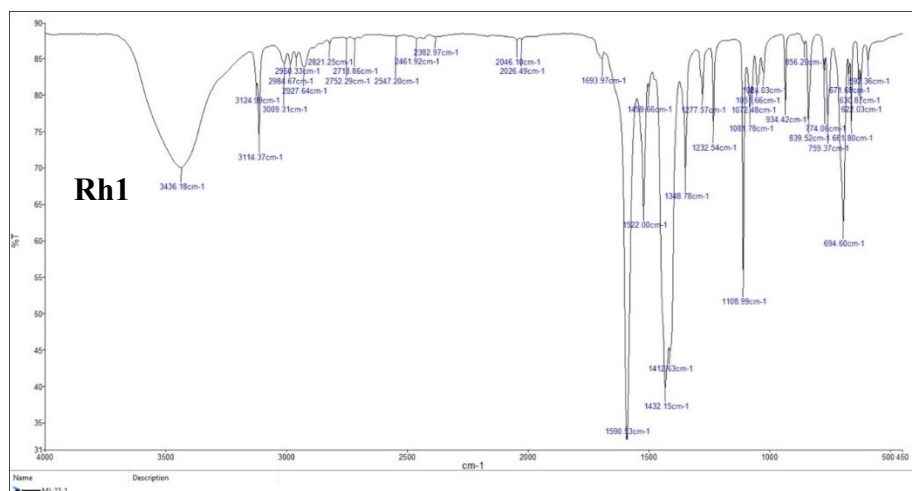



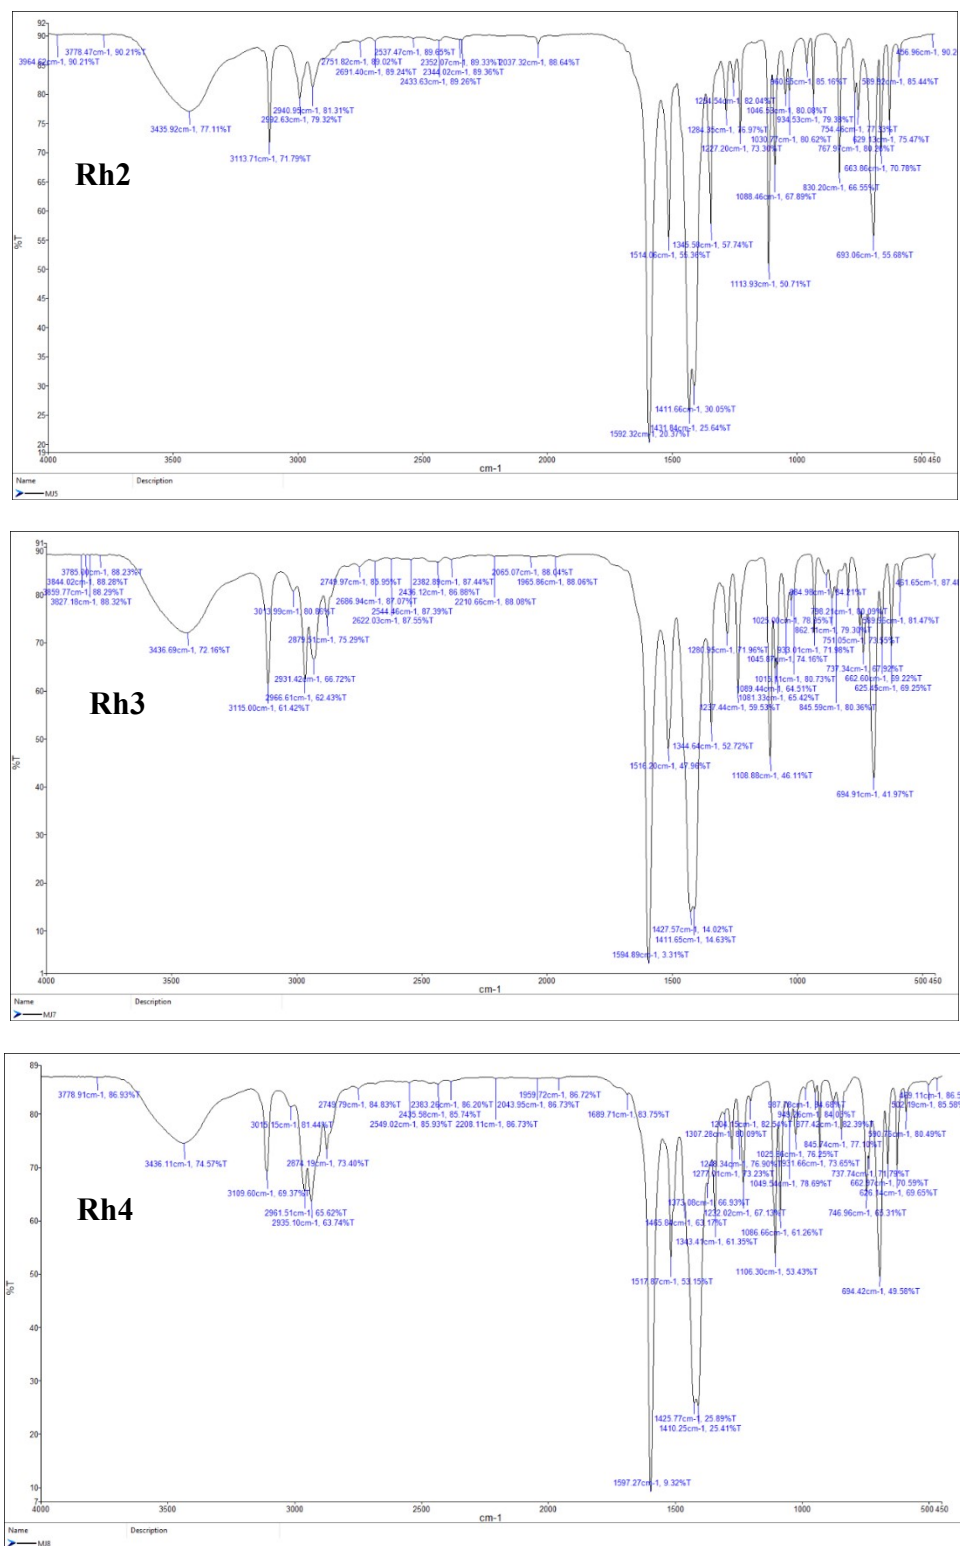

Fig. S3. IR spectra of complexes Rh1-Rh4.

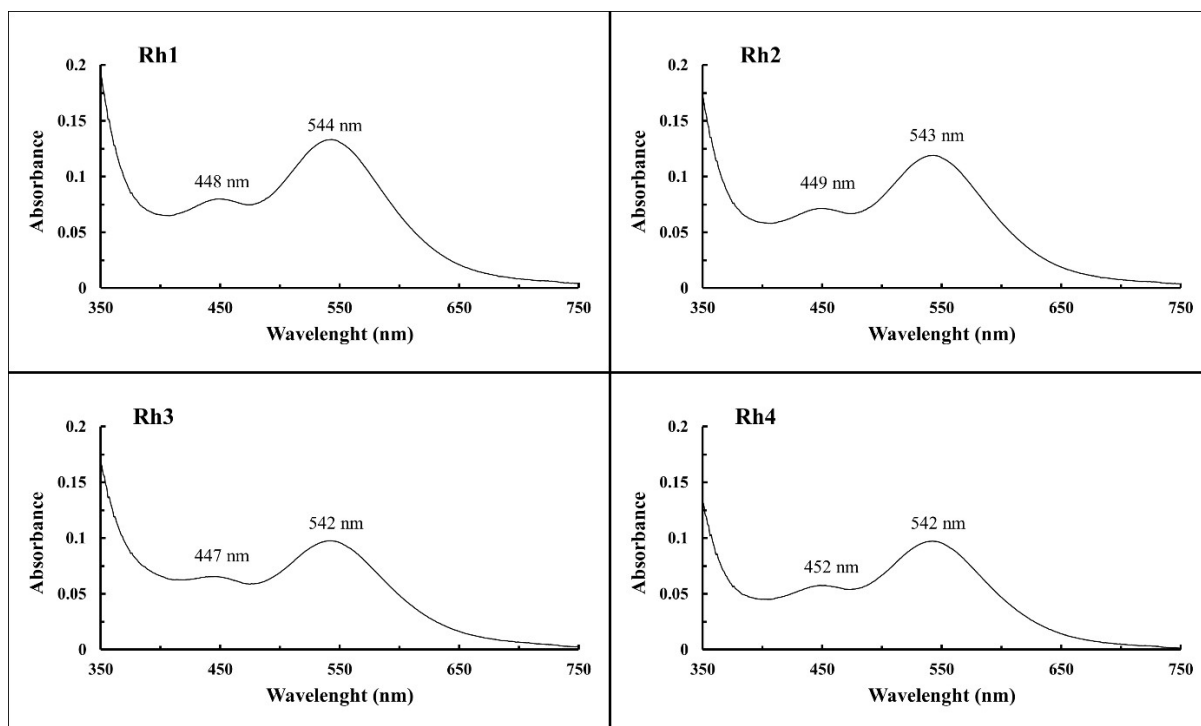

**Fig. S4.** UV-Vis spectra of Rh1-Rh4 complexes

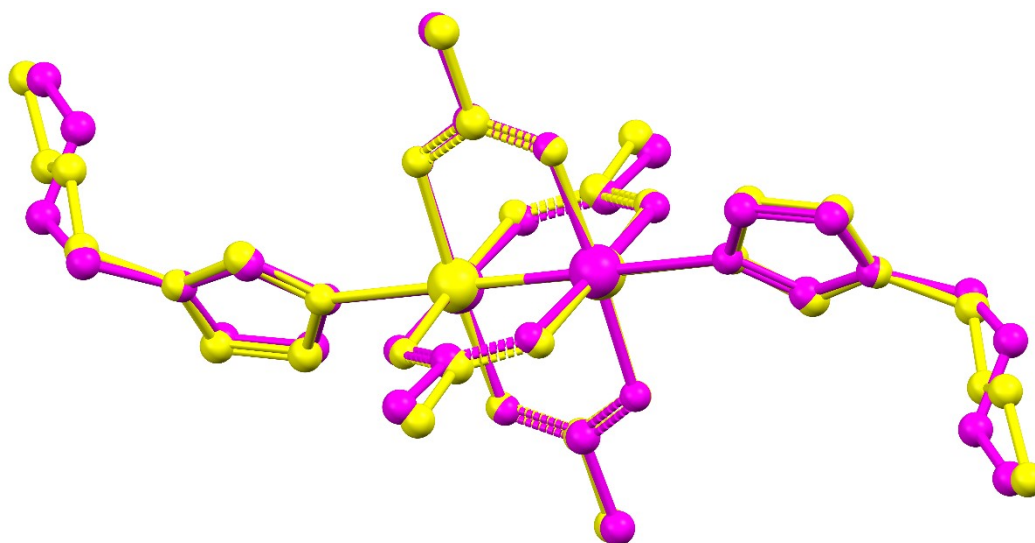

**Fig. S5.** MERCURY drawing of the overlay of the two crystallographically independent molecules of the **Rh4** complex: the molecule containing the Rh1 atom is shown in magenta, and the molecule containing the Rh2 atom in yellow.

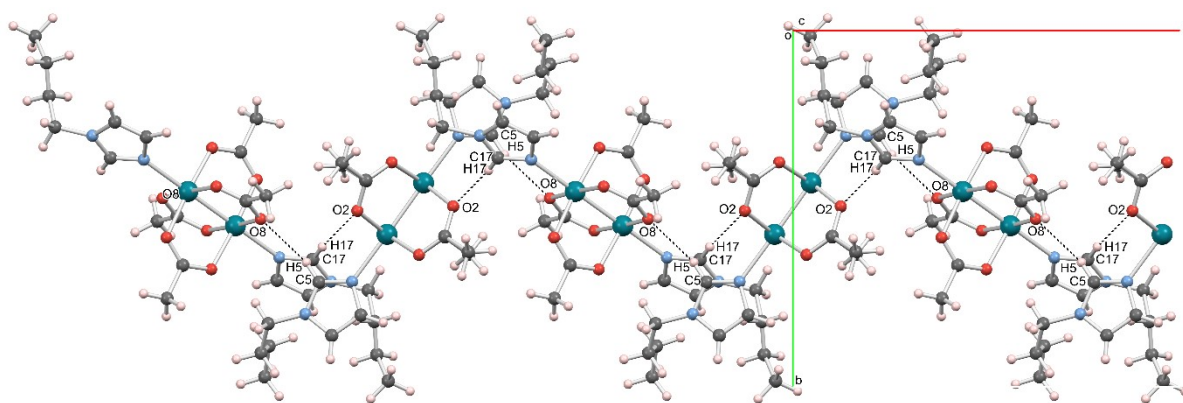

**Fig. S6.** MERCURY drawing of the crystal packing of **Rh4** viewed along the *c* axis, showing C—H···O contacts (dashed line) which connect molecules in a head-to-tail manner along the *a* axis.

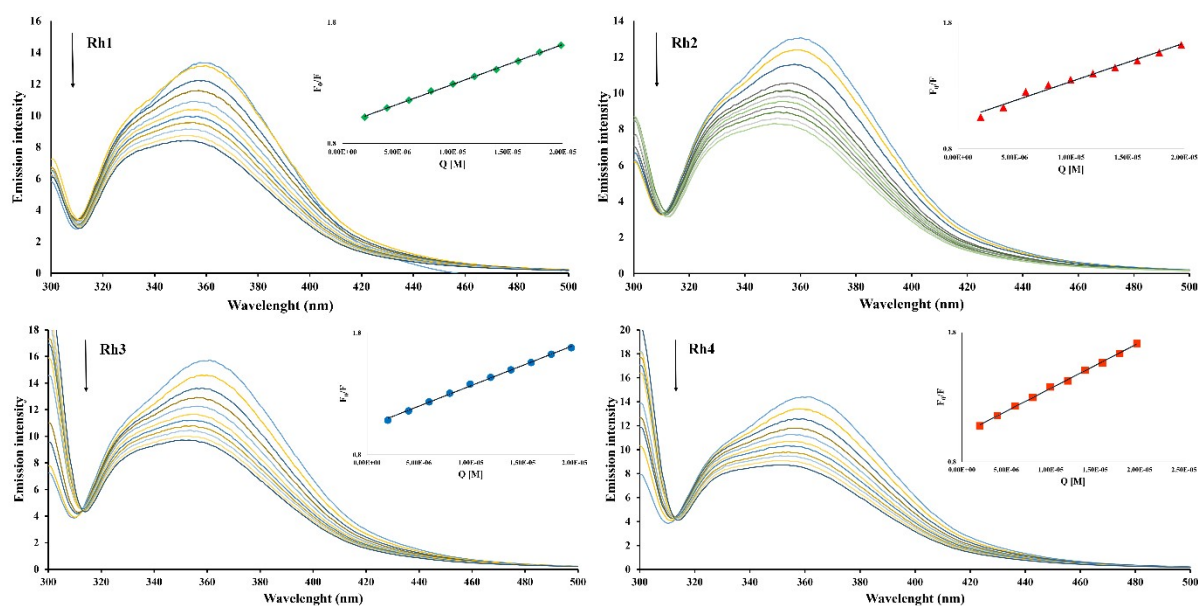

**Fig. S7.** Emission spectra of HSA in the presence of complexes **Rh1-Rh4**. [HSA] = 2  $\mu$ M, [complex] = 0-20  $\mu$ M;  $\lambda_{\text{ex}}$  = 295 nm. The arrow shows the changes of the intensity upon increasing the concentration of complexes. The inset shows the plot of  $F_0/F$  vs. [Q].

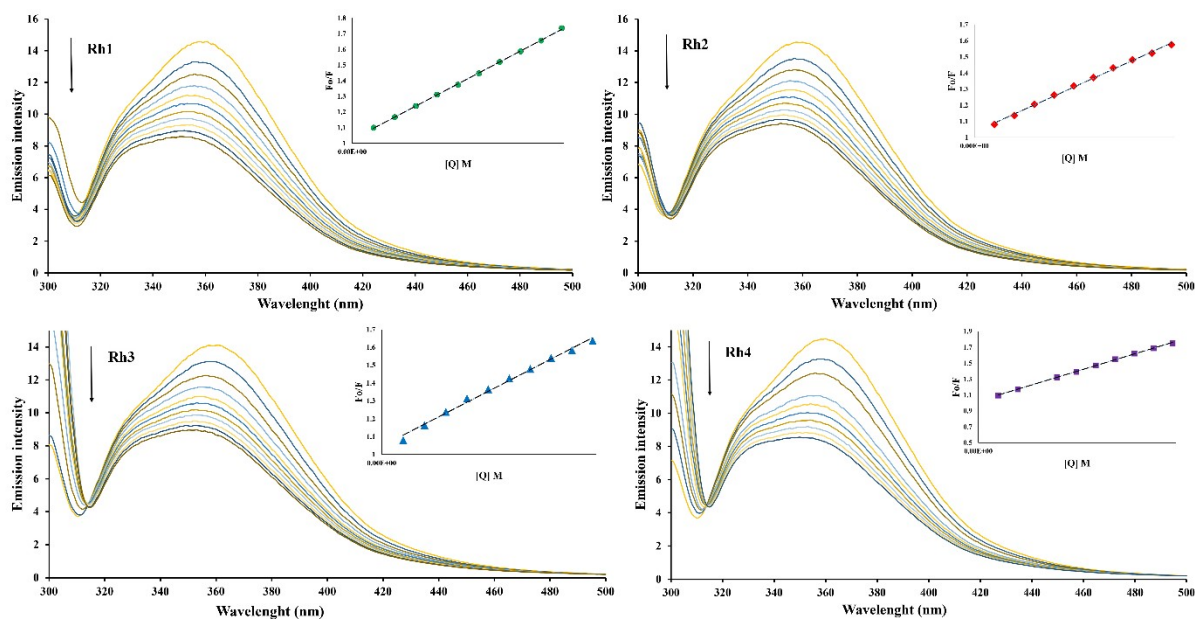

**Fig. S8.** HSA-ibuprofen emission spectra in the presence of **Rh1-Rh4**.  $[HSA] = [ibuprofen] = 2 \mu\text{M}$ ,  $[complex] = 0\text{-}20 \mu\text{M}$ ;  $\lambda_{ex} = 295 \text{ nm}$ . The arrow shows the changes of the intensity upon increasing the concentration of complexes. The inset shows the plot of  $F_0/F$  vs.  $[Q]$ .

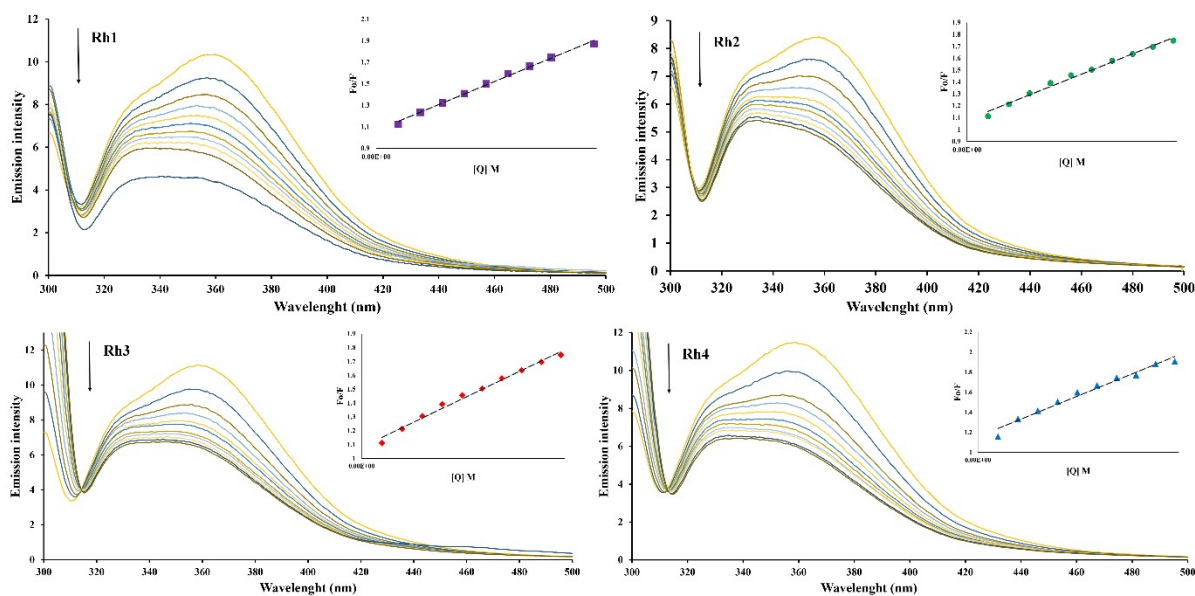

**Fig. S9.** HSA-methyl orange emission spectra in the presence of **Rh1 - Rh4**.  $[HSA] = [methyl\ orange] = 2 \mu\text{M}$ ,  $[complex] = 0\text{-}20 \mu\text{M}$ ;  $\lambda_{ex} = 295 \text{ nm}$ . The arrow shows the changes of the intensity upon increasing the concentration of complexes. The inset shows the plot of  $F_0/F$  vs.  $[Q]$ .

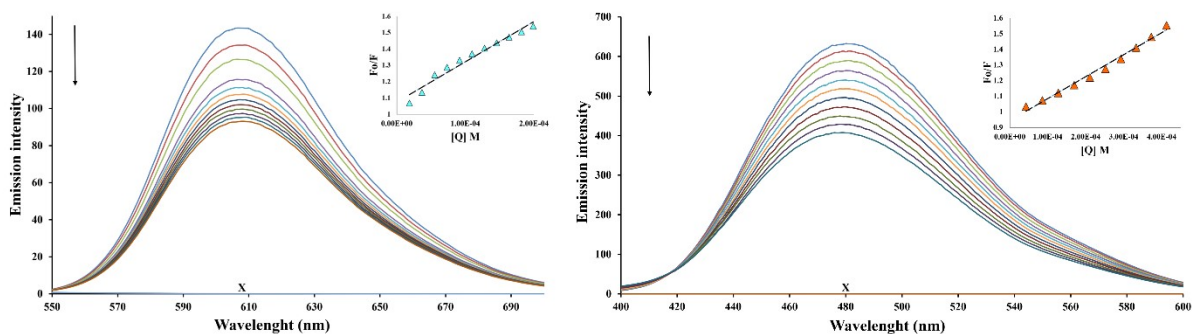

**Fig S10.** Emission spectra of DNA-EB (left)/DNA-HOE (right) in the absence and presence of **Rh1**. [DNA] = 100  $\mu\text{M}$ ; [EB/HOE] = 10  $\mu\text{M}$ ; [**Rh1**] = 0-180  $\mu\text{M}$  for EB; 0-400  $\mu\text{M}$  for HOE.  $\lambda_{\text{ex(EB)}}$  = 520 nm;  $\lambda_{\text{ex(HOE)}}$  = 346 nm. Arrow shows the changes of the intensity upon increasing the concentration of complex. The inset shows the plot of  $F_0/F$  vs. [Q]. X represents free complex.

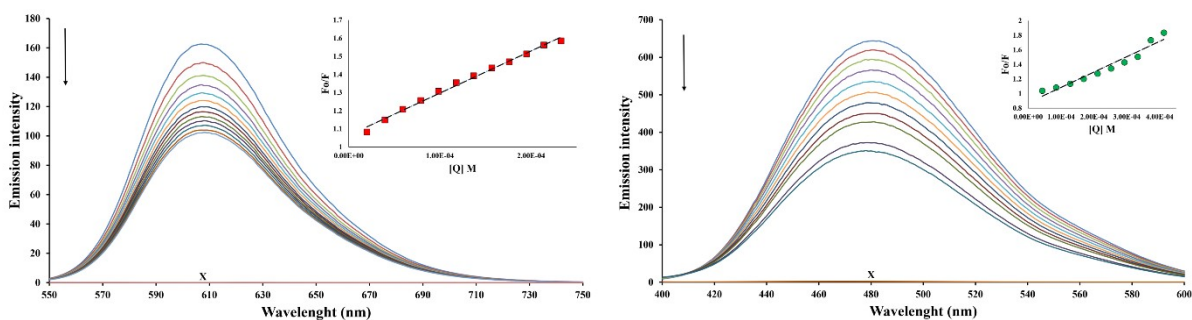

**Fig S11.** Emission spectra of DNA-EB (left)/DNA-HOE (right) in the absence and presence of **Rh2**. [DNA] = 100  $\mu\text{M}$ ; [EB/HOE] = 10  $\mu\text{M}$ ; [**Rh2**] = 0-180  $\mu\text{M}$  for EB; 0-400  $\mu\text{M}$  for HOE.  $\lambda_{\text{ex(EB)}}$  = 520 nm;  $\lambda_{\text{ex(HOE)}}$  = 346 nm. Arrow shows the changes of the intensity upon increasing the concentration of complex. The inset shows the plot of  $F_0/F$  vs. [Q]. X represents free complex.

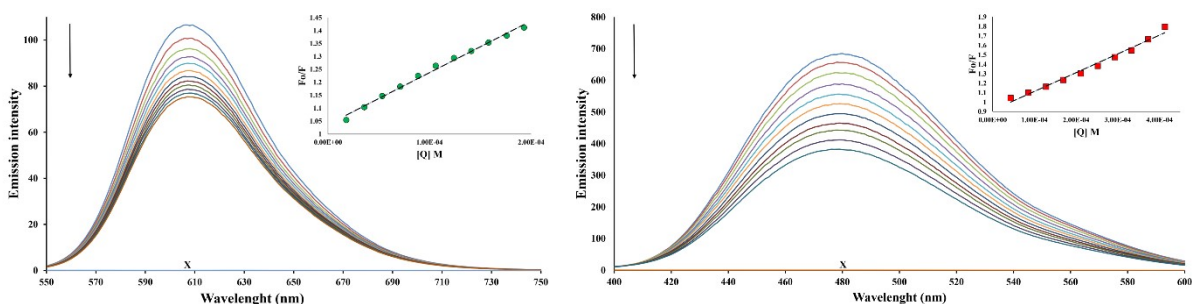

**Fig S12.** Emission spectra of DNA-EB (left)/DNA-HOE (right) in the absence and presence of **Rh3**. [DNA] = 100  $\mu\text{M}$ ; [EB/HOE] = 10  $\mu\text{M}$ ; [**Rh3**] = 0-180  $\mu\text{M}$  for EB; 0-400  $\mu\text{M}$  for HOE.  $\lambda_{\text{ex(EB)}}$  = 520 nm;  $\lambda_{\text{ex(HOE)}}$  = 346 nm. Arrow shows the changes of the intensity upon increasing

the concentration of complex. The inset shows the plot of  $F_0/F$  vs.  $[Q]$ . X represents free complex.

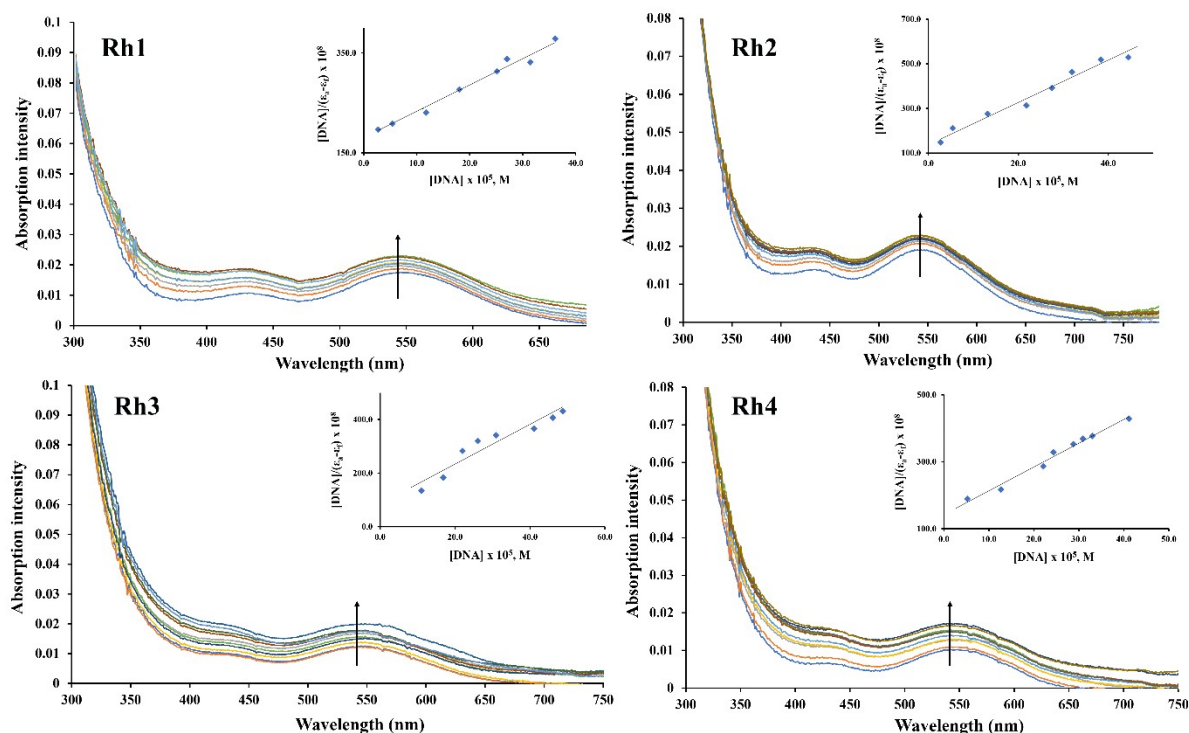

**Fig. S13.** Absorption spectra of **Rh1-Rh4** complexes in the absence and presence of increasing amounts of CT DNA:  $[\text{complex}] = 100 \mu\text{M}$ ,  $[\text{DNA}] = 0\text{-}500 \mu\text{M}$ . Inset: linear plot for the calculation of the intrinsic DNA binding constant ( $K_b$ ).

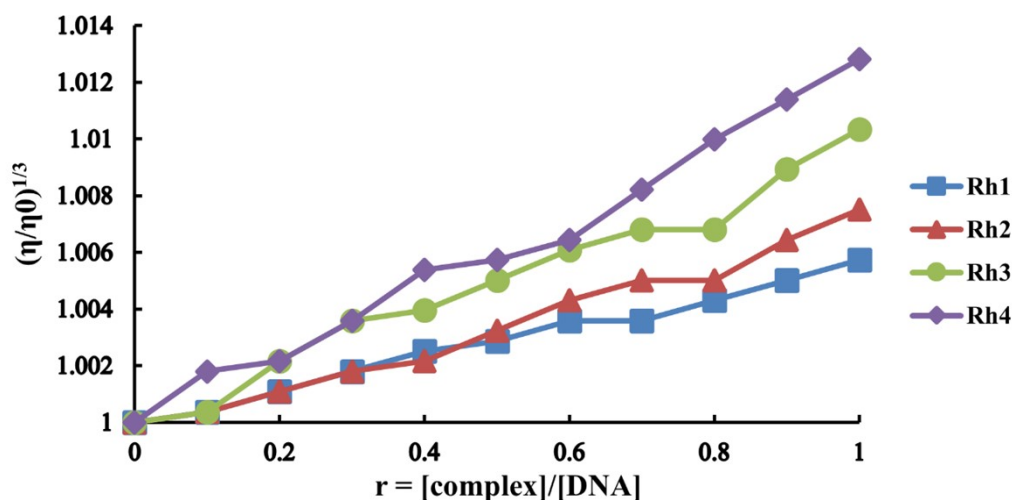

**Fig. S14.** Relative viscosity  $(\eta/\eta_0)^{1/3}$  of CT DNA ( $100 \mu\text{M}$ ) in PBS buffer in the presence of the increasing amounts of complexes **Rh1-Rh4** ( $r$ )

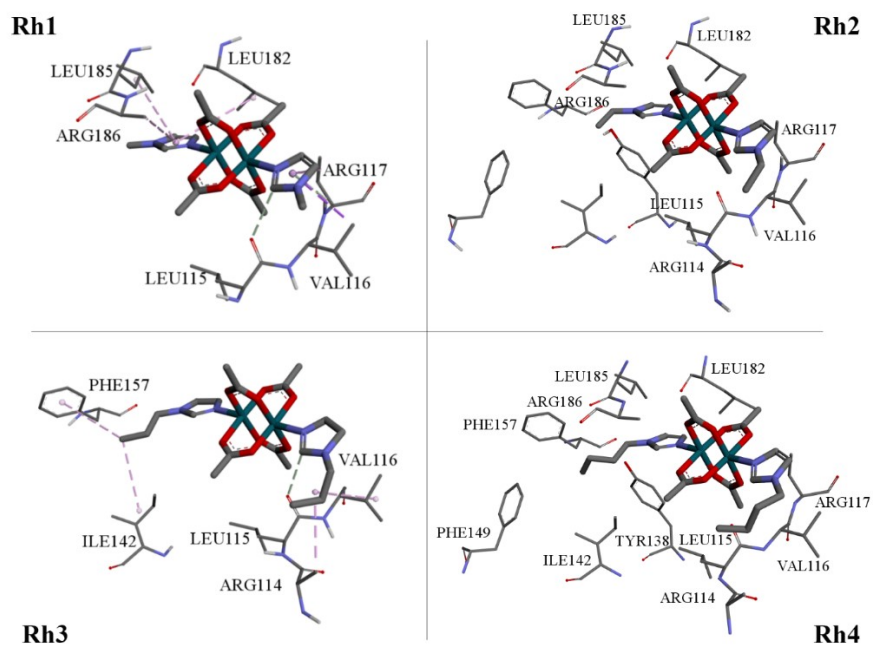

**Fig. S15.** Interactions of **Rh1-Rh4** with residues in binding site of IB domain, obtained by molecular docking.

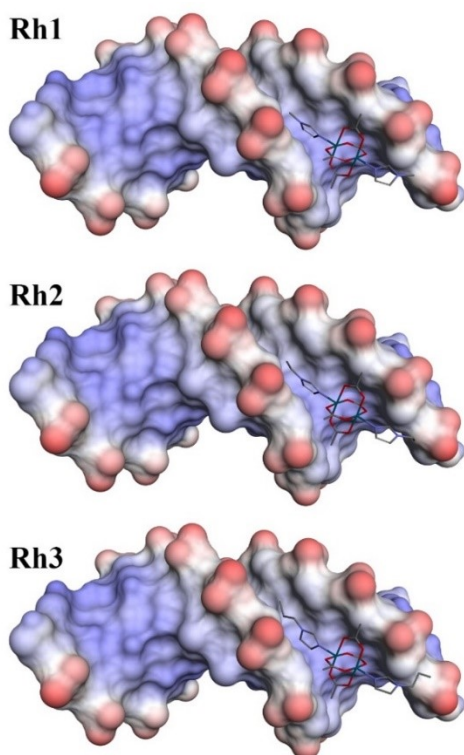

**Fig. S16.** Structures with the lowest energy of binding of **Rh1-Rh3** in the minor groove of DNA.

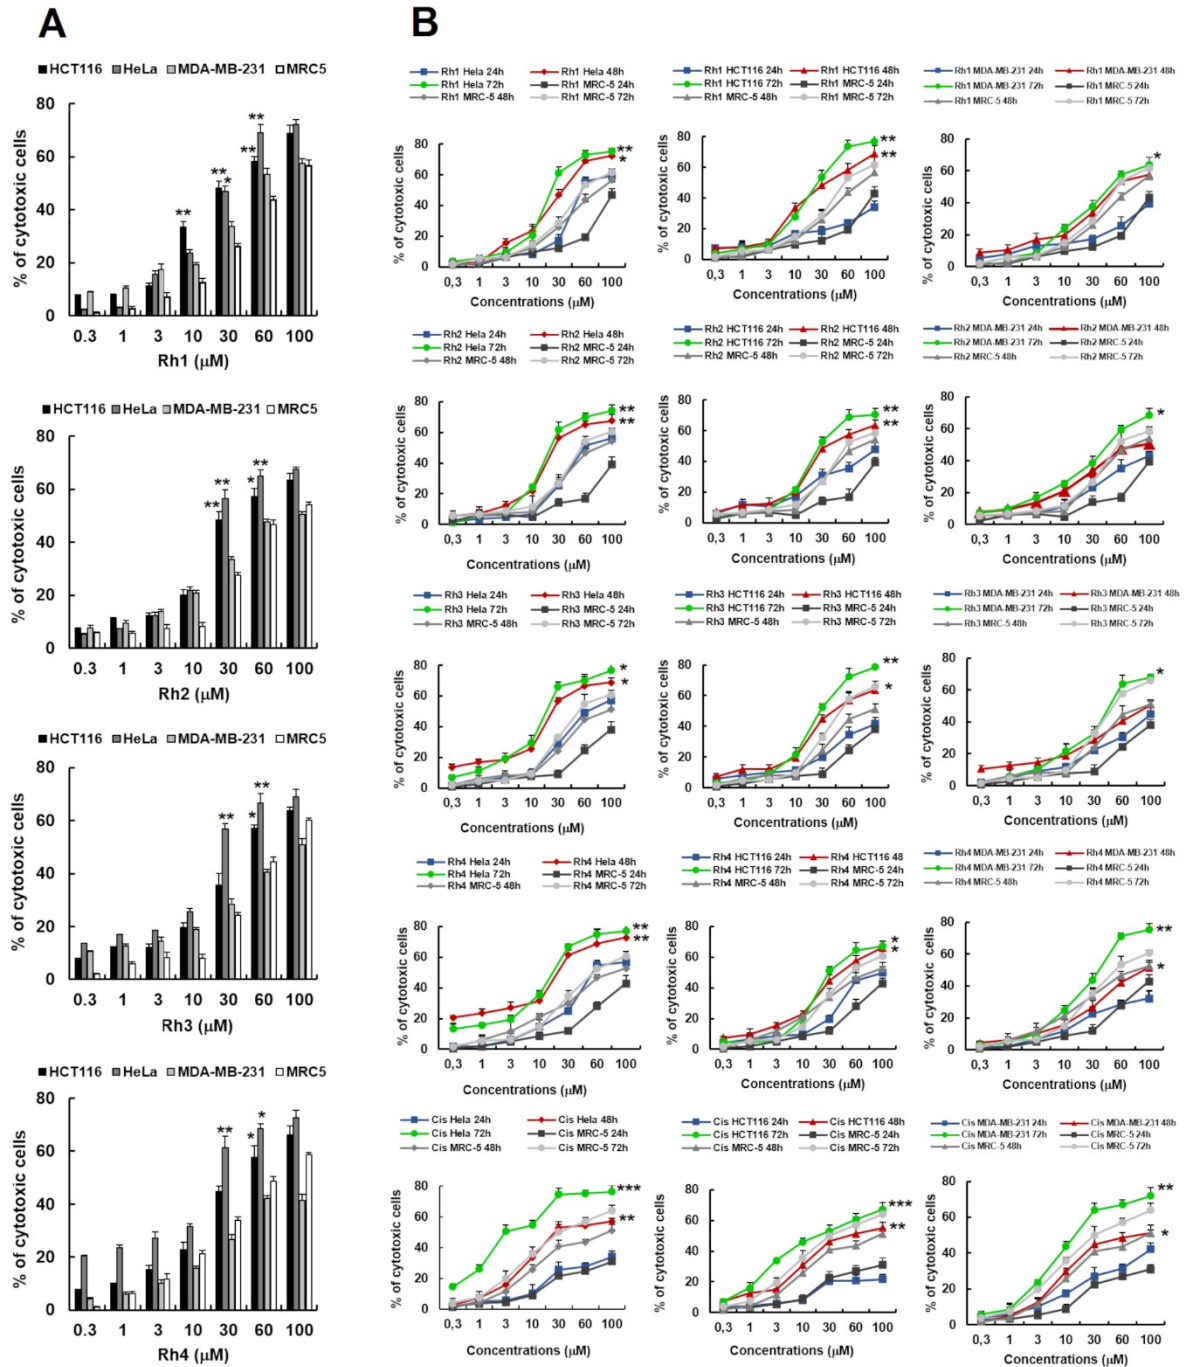

**Fig. S17.** Rh1-Rh4 inhibited the proliferation of HeLa cervical, HCT116 colon, and MDA-MB-231 breast cancer cells. Cells were treated with **Rh1-Rh4** and cisplatin at the indicated concentrations (0.3, 1, 3, 10, 30, 60, and 100 mM) for 48h (A) and 24, 48 and 72 h (B). (A) Bar graphs show % of cytotoxic cells of triplicate readings from a representative experiment; bars,  $\pm$  standard error. (B) The dose and time response curves were obtained by plotting the % of cytotoxic cells versus the log concentration of **Rh1-Rh4** and cisplatin used. Points, mean % of cell cytotoxicity based on quintuplicate assays, bars,  $\pm$  SE. \* $P < 0.05$ , \*\* $P < 0.01$ , and \*\*\* $P < 0.001$  vs. the control group (ctrl).



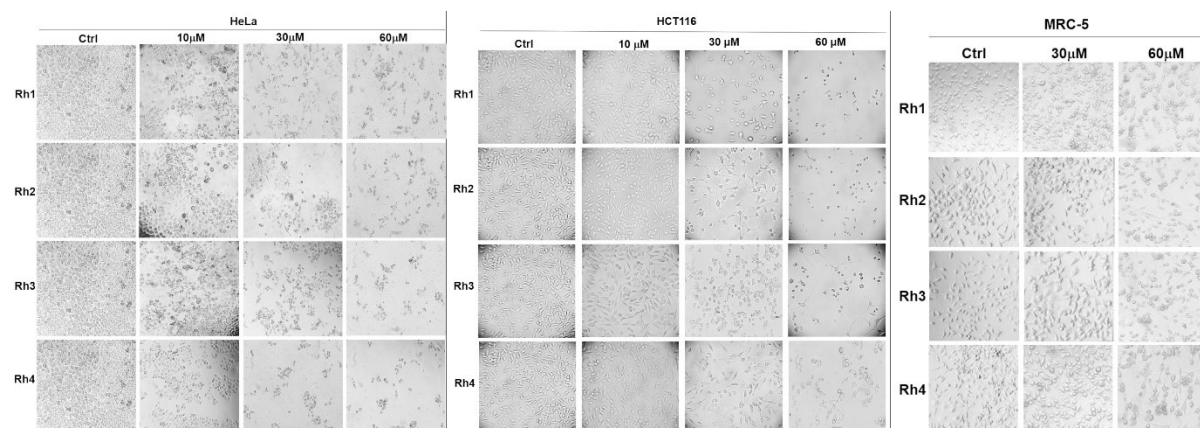

**Fig. S18.** Effect of Rh1-Rh4 on the morphology of HeLa, HCT116 and MRC-5 cells.

**Table S1** Selected geometric parameters for complex **Rh4**.

| <b>Bond length [Å]</b>               |             |                                        |             |
|--------------------------------------|-------------|----------------------------------------|-------------|
| Rh1—O1                               | 2.035 (4)   | Rh2—O5                                 | 2.048 (5)   |
| Rh1—O2                               | 2.038 (4)   | Rh2—O6                                 | 2.040 (4)   |
| Rh1—O3 <sup>i</sup>                  | 2.044 (4)   | Rh2—O7 <sup>ii</sup>                   | 2.053 (4)   |
| Rh1—O4 <sup>i</sup>                  | 2.043 (4)   | Rh2—O8 <sup>ii</sup>                   | 2.042 (4)   |
| Rh1—N1                               | 2.237 (5)   | Rh2—N3                                 | 2.242 (6)   |
| Rh1—Rh1 <sup>i</sup>                 | 2.4032 (9)  | Rh2—Rh2 <sup>ii</sup>                  | 2.4032 (10) |
| <b>Bond angles [°]</b>               |             |                                        |             |
| O1—Rh1—O2                            | 89.96 (19)  | O6—Rh2—O8 <sup>ii</sup>                | 175.66 (19) |
| O1—Rh1—O4 <sup>i</sup>               | 90.33 (18)  | O6—Rh2—O5                              | 90.23 (19)  |
| O2—Rh1—O4 <sup>i</sup>               | 175.85 (18) | O8 <sup>ii</sup> —Rh2—O5               | 89.16 (19)  |
| O1—Rh1—O3 <sup>i</sup>               | 175.93 (17) | O6—Rh2—O7 <sup>ii</sup>                | 90.09 (19)  |
| O2—Rh1—O3 <sup>i</sup>               | 89.55 (18)  | O8 <sup>ii</sup> —Rh2—O7 <sup>ii</sup> | 90.17 (19)  |
| O4 <sup>i</sup> —Rh1—O3 <sup>i</sup> | 89.87 (18)  | O5—Rh2—O7 <sup>ii</sup>                | 175.41 (19) |
| O1—Rh1—N1                            | 90.95 (18)  | O6—Rh2—N3                              | 91.53 (19)  |
| O2—Rh1—N1                            | 91.66 (18)  | O8 <sup>ii</sup> —Rh2—N3               | 92.79 (19)  |
| O4 <sup>i</sup> —Rh1—N1              | 92.48 (18)  | O5—Rh2—N3                              | 92.61 (19)  |
| O3 <sup>i</sup> —Rh1—N1              | 93.10 (17)  | O7 <sup>ii</sup> —Rh2—N3               | 91.96 (18)  |
| O1—Rh1—Rh1 <sup>i</sup>              | 88.27 (13)  | O6—Rh2—Rh2 <sup>ii</sup>               | 87.57 (14)  |
| <b>Torsion angles [°]</b>            |             |                                        |             |
| Rh1—N1—C5—N2                         | -178.0 (4)  | Rh2—N3—C17—N4                          | -180.0 (4)  |
| Rh1—O2—C2—O4                         | 0.8 (10)    | Rh2—O6—C13—O8                          | 0.8 (10)    |
| Rh1—O2—C2—C4                         | -179.2 (5)  | Rh2—O6—C13—C15                         | -179.2 (6)  |
| Rh1 <sup>i</sup> —O4—C2—O2           | -0.3 (9)    | Rh2—O5—C12—O7                          | 0.4 (11)    |
| Rh1 <sup>i</sup> —O4—C2—C4           | 179.8 (5)   | Rh2—O5—C12—C14                         | -178.3 (5)  |

Symmetry codes: (i)  $-x+2, -y+1, -z+1$ ; (ii)  $-x+1, -y+1, -z+1$ .

**Table S2** C—H $\cdots$ O interactions parameters for complex **Rh4**.

| $D\text{—H}\cdots A$           | $D\text{—H}$ (Å) | $H\cdots A$ (Å) | $D\cdots A$ (Å) | $D\text{—H}\cdots A$ (°) |
|--------------------------------|------------------|-----------------|-----------------|--------------------------|
| C5—H5 $\cdots$ O8 <sup>i</sup> | 0.93             | 2.55            | 3.465 (8)       | 166.8                    |
| C17—H17 $\cdots$ O2            | 0.93             | 2.45            | 3.364 (8)       | 167.4                    |

Symmetry code: (i)  $-x+1, -y+1, -z+1$ .**Table S3** HSA constants ( $K_{sv}$ ,  $k_q$ ,  $K_b$ ) and number of binding sites ( $n$ ) for the interactions of **Rh1-Rh4** in the absence and the presence of site markers.

| System                        | $K_{SV}$ (M <sup>-1</sup> ) | $k_q$ (M <sup>-1</sup> s <sup>-1</sup> ) | $K_b$ (M <sup>-1</sup> ) | $n$  |
|-------------------------------|-----------------------------|------------------------------------------|--------------------------|------|
| <b>Rh1</b> -HSA               | $3.30 \times 10^4$          | $3.30 \times 10^{12}$                    | $1.81 \times 10^5$       | 1.16 |
| <b>Rh1</b> -HSA-warfarin      | $4.05 \times 10^4$          | $4.05 \times 10^{12}$                    | $7.26 \times 10^4$       | 1.05 |
| <b>Rh1</b> -HSA-ibuprofen     | $3.55 \times 10^4$          | $3.55 \times 10^{12}$                    | $9.90 \times 10^3$       | 0.88 |
| <b>Rh1</b> -HSA-methyl orange | $4.24 \times 10^4$          | $4.24 \times 10^{12}$                    | $9.78 \times 10^3$       | 0.86 |
| <b>Rh2</b> -HSA               | $3.04 \times 10^4$          | $3.04 \times 10^{12}$                    | $4.47 \times 10^4$       | 1.02 |
| <b>Rh2</b> -HSA-warfarin      | $2.56 \times 10^4$          | $2.56 \times 10^{12}$                    | $1.33 \times 10^4$       | 0.94 |
| <b>Rh2</b> -HSA-ibuprofen     | $2.81 \times 10^4$          | $2.81 \times 10^{12}$                    | $7.57 \times 10^3$       | 0.87 |
| <b>Rh2</b> -HSA-methyl orange | $3.51 \times 10^4$          | $3.51 \times 10^{12}$                    | $5.58 \times 10^3$       | 0.82 |
| <b>Rh3</b> -HSA               | $3.34 \times 10^4$          | $3.34 \times 10^{12}$                    | $1.40 \times 10^4$       | 0.92 |
| <b>Rh3</b> -HSA-warfarin      | $2.70 \times 10^4$          | $2.70 \times 10^{12}$                    | $2.47 \times 10^4$       | 0.99 |
| <b>Rh3</b> -HSA-ibuprofen     | $3.09 \times 10^4$          | $3.09 \times 10^{12}$                    | $1.04 \times 10^4$       | 0.89 |
| <b>Rh3</b> -HSA-methyl orange | $3.52 \times 10^4$          | $3.52 \times 10^{12}$                    | $5.62 \times 10^3$       | 0.82 |
| <b>Rh4</b> -HSA               | $3.53 \times 10^4$          | $3.53 \times 10^{12}$                    | $2.23 \times 10^4$       | 0.96 |
| <b>Rh4</b> -HSA-warfarin      | $2.83 \times 10^4$          | $2.83 \times 10^{12}$                    | $1.19 \times 10^4$       | 0.92 |
| <b>Rh4</b> -HSA-ibuprofen     | $3.74 \times 10^4$          | $3.74 \times 10^{12}$                    | $1.45 \times 10^4$       | 0.91 |
| <b>Rh4</b> -HSA-methyl orange | $4.09 \times 10^4$          | $4.09 \times 10^{12}$                    | $2.80 \times 10^3$       | 0.74 |

**Table S4** The DNA Stern–Volmer constants ( $K_{sv}$ ) and binding constants ( $K_b$ ) for complexes **Rh1-Rh4** from CT DNA-EB and CT DNA-HOE fluorescence.

| Complex    | $K_{SV(EB)}$ [M <sup>-1</sup> ] | $K_{b(EB)}$ [M <sup>-1</sup> ] | $K_{SV(HOE)}$ [M <sup>-1</sup> ] | $K_{b(HOE)}$ [M <sup>-1</sup> ] | $K_b$ <sup>a</sup> [M <sup>-1</sup> ] |
|------------|---------------------------------|--------------------------------|----------------------------------|---------------------------------|---------------------------------------|
| <b>Rh1</b> | $2.03 \times 10^3$              | $7.79 \times 10^2$             | $1.59 \times 10^3$               | $1.39 \times 10^4$              | $1.05 \times 10^4$                    |
| <b>Rh2</b> | $2.18 \times 10^3$              | $4.36 \times 10^2$             | $2.43 \times 10^3$               | $2.71 \times 10^4$              | $7.34 \times 10^3$                    |
| <b>Rh3</b> | $1.93 \times 10^3$              | $5.64 \times 10^2$             | $2.16 \times 10^3$               | $1.85 \times 10^4$              | $1.09 \times 10^4$                    |
| <b>Rh4</b> | $2.22 \times 10^3$              | $5.53 \times 10^2$             | $2.04 \times 10^3$               | $1.72 \times 10^4$              | $1.16 \times 10^4$                    |

<sup>a</sup> UV-Vis data**Table S5** Estimated energies of binding ( $\Delta E_b$ ) of tested compounds with

various targets, obtained from molecular docking experiments.

| Compound   | $\Delta E_b$ [kcal mol <sup>-1</sup> ] |       |       |       |
|------------|----------------------------------------|-------|-------|-------|
|            | IIA                                    | IIIA  | IB    | DNA   |
| <b>Rh1</b> | -4.52                                  | -4.77 | -5.56 | -4.00 |
| <b>Rh2</b> | -4.76                                  | -5.01 | -5.79 | -4.10 |
| <b>Rh3</b> | -4.74                                  | -5.05 | -6.29 | -4.30 |
| <b>Rh4</b> | -5.36                                  | -5.22 | -6.58 | -4.78 |

**Table S6** Selectivity index (SI) for **Rh1-Rh4** and cisplatin for particular tumor cells for 48h.

| Complex    | Selectivity index (SI) |        |            |      |        |            |      |        |            |
|------------|------------------------|--------|------------|------|--------|------------|------|--------|------------|
|            | 24h                    |        |            | 48h  |        |            | 72h  |        |            |
|            | Hela                   | HCT116 | MDA-MB-231 | Hela | HCT116 | MDA-MB-231 | Hela | HCT116 | MDA-MB-231 |
| <b>Rh1</b> | 2.98                   | 0.67   | 1.45       | 2.46 | 2.61   | 1.28       | 2.5  | 2.2    | 1.12       |
| <b>Rh2</b> | 2.03                   | 0.65   | 0.82       | 3.13 | 2.21   | 1.01       | 2.7  | 1.96   | 1.16       |
| <b>Rh3</b> | 2.13                   | 0.43   | 1.01       | 3.71 | 2.22   | 0.91       | 2.82 | 1.9    | 1.27       |
| <b>Rh4</b> | 1.85                   | 0.73   | <0.6       | 4.38 | 2.1    | 0.94       | 3.56 | 1.98   | 1.75       |
| Cisplatin  | <0.6                   | <0.6   | <0.6       | 3.7  | 1.73   | 1.55       | 7.33 | 1.84   | 2.54       |

**Table S7** Crystallographic data and refinement parameters for complex **Rh4**.

| <i>Crystal data</i>         |                                                                                                       |
|-----------------------------|-------------------------------------------------------------------------------------------------------|
| Chemical formula            | 2(C <sub>11</sub> H <sub>18</sub> N <sub>2</sub> O <sub>4</sub> Rh)·1[C <sub>7</sub> H <sub>8</sub> ] |
| $M_r$                       | 782.51                                                                                                |
| Crystal system              | Monoclinic                                                                                            |
| Space group                 | $P2_1/c$                                                                                              |
| $a$ (Å)                     | 15.7537 (6)                                                                                           |
| $b$ (Å)                     | 13.5490 (5)                                                                                           |
| $c$ (Å)                     | 17.3153 (7)                                                                                           |
| $\beta$ (°)                 | 110.366 (5)                                                                                           |
| $V$ (Å <sup>3</sup> )       | 3464.9 (3)                                                                                            |
| $Z$                         | 4                                                                                                     |
| $D_x$ (Mg m <sup>-3</sup> ) | 1.500                                                                                                 |
| $\mu$ (mm <sup>-1</sup> )   | 1.00                                                                                                  |
| Crystal size (mm)           | 0.40 × 0.27 × 0.25                                                                                    |
| Crystal shape               | Prism                                                                                                 |
| Colour                      | Purple                                                                                                |
| <i>Data collection</i>      |                                                                                                       |
| Absorption correction       | Multi-Scan                                                                                            |

Electronic Supplementary Information

|                                           |                                                                          |
|-------------------------------------------|--------------------------------------------------------------------------|
| $T_{\min}, T_{\max}$                      | 0.944, 1.000                                                             |
| Reflections collected                     | 17655                                                                    |
| Independent reflections                   | 8088                                                                     |
| Observed reflections [ $I > 2\sigma(I)$ ] | 5710                                                                     |
| $R_{\text{int}}$                          | 0.031                                                                    |
| Range of $h, k, l$                        | $h = -21 \rightarrow 20, k = -17 \rightarrow 17, l = -23 \rightarrow 23$ |
| $\theta$ values ( $^{\circ}$ )            | $\theta_{\max} = 29.3, \theta_{\min} = 2.0$                              |

---

*Refinement*

---

|                                                                        |                |
|------------------------------------------------------------------------|----------------|
| $R[F^2 > 2\sigma(F^2)], wR(F^2)$                                       | 0.0629, 0.1645 |
| $R[\text{all data}], wR2$                                              | 0.0898, 0.1502 |
| Goodness-of-fit ( $S$ )                                                | 1.065          |
| No. of reflections                                                     | 8088           |
| No. of parameters                                                      | 331            |
| No. of restraints                                                      | 34             |
| $\Delta\rho_{\max}, \Delta\rho_{\min}$ ( $\text{e } \text{\AA}^{-3}$ ) | 1.11, -0.60    |
| CCDC no.                                                               | 2340710        |

---
